# Supplementary material
Source: PubMed Central journal article supplement (PMC3964804)
Supplement: NIHMS559532-supplement-Sup_Figs.pdf [file NIHMS559532-supplement-Sup_Figs.pdf]

## Supplementary Materials for Conserved Regulators of Nucleolar Size Revealed by Global Phenotypic Analyses

Ralph A. Neumüller, Thomas Gross, Anastasia A. Samsonova, Arunachalam Vinayagam, Michael Buckner, Karen Founk, Yanhui Hu, Sara Sharifpoor, Adam P. Rosebrock, Brenda Andrews, Fred Winston,\* Norbert Perrimon\*

\*Corresponding author. E-mail: perrimon@receptor.med.harvard.edu (N.P.); winston@genetics.med.harvard.edu (F.W.)

Published 20 August 2013, *Sci. Signal.* **6**, ra70 (2013)  
DOI: 10.1126/scisignal.2004145

### This PDF file includes:

- Fig. S1. SGA screen for nucleolar defects in *S. cerevisiae*.
- Fig. S2. Supporting graphs for nucleolar size quantification.
- Fig. S3. The rDNA promoter proteome.
- Fig. S4. Examples of protein complexes that scored in the SGA screen.
- Fig. S5. A genome-wide RNAi screen for nucleolar size defects in *Drosophila* cell culture.
- Fig. S6. Comparative GO term analysis between the *S. cerevisiae* SGA and the *D. melanogaster* RNAi screens.
- Fig. S7. Altered nucleolar size upon loss of ribosomal function in *D. melanogaster* and *S. cerevisiae*.
- Fig. S8. The *Drosophila* FACT complex is required for cell growth.
- Fig. S9. The HIR complex double-mutant *hir1Δhir2Δ* shows increased Pol I occupancy over the 35S rDNA region.
- Fig. S10. Growth measurements of HIR complex mutants.

### Other Supplementary Material for this manuscript includes the following: (available at [www.sciencesignaling.org/cgi/content/full/6/289/ra70/DC1](http://www.sciencesignaling.org/cgi/content/full/6/289/ra70/DC1))

- Table S1 (Microsoft Excel format). *S. cerevisiae* SGA screen.
- Table S2 (Microsoft Excel format). GO term enrichment analyses (*S. cerevisiae* SGA screen).
- Table S3 (Microsoft Excel format). Molecular complex analysis (*S. cerevisiae*).
- Table S4 (Microsoft Excel format). TALO8 purification—35S rDNA-associated proteome in *S. cerevisiae*.

Table S5 (Microsoft Excel format). *D. melanogaster* dsRNAi screen.

Table S6 (Microsoft Excel format). Molecular complex analysis (*D. melanogaster*).

Table S7 (Microsoft Excel format). Evolutionarily conserved complexes between *D. melanogaster* and *S. cerevisiae*.

Table S8 (Microsoft Excel format). *S. cerevisiae* strains.

Table S9 (Microsoft Excel format). Primers.

Raw image files S1 to S4.

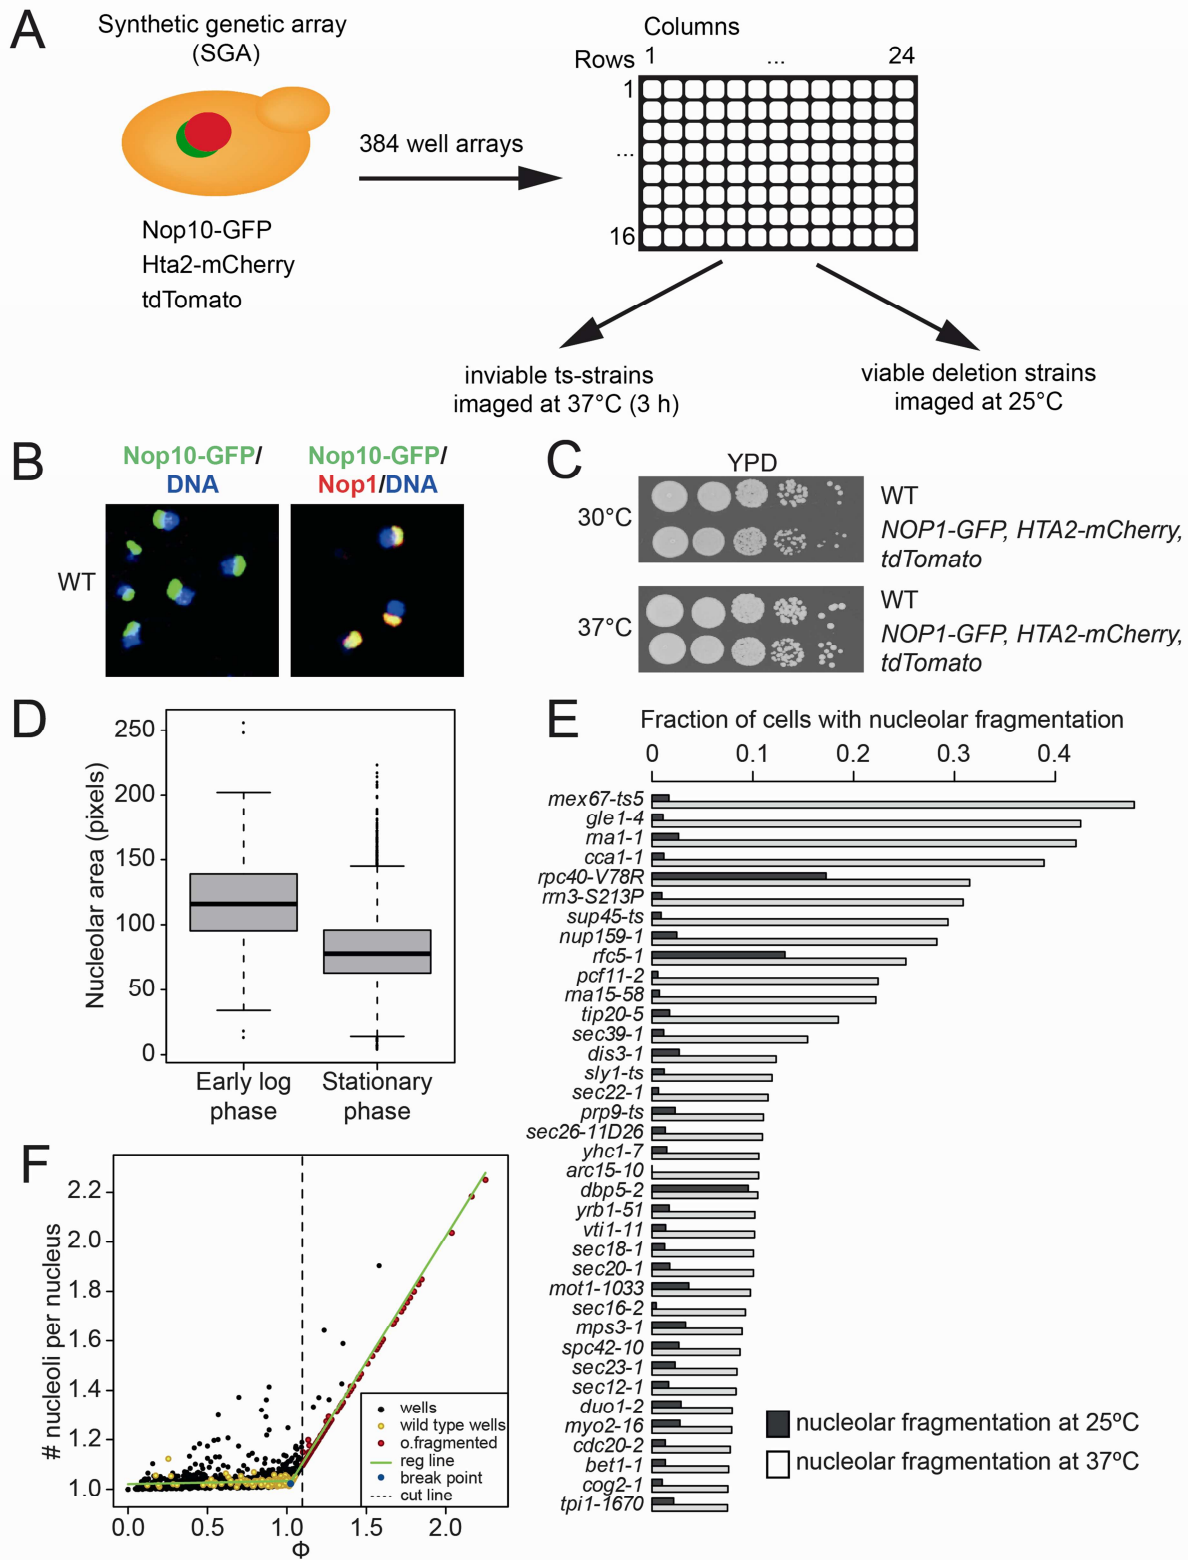

**Figure S1.** SGA screen for nucleolar defects in *S. cerevisiae*.

(A) Schematic overview of the SGA screen.

(B) Co-localization of Nop10-GFP and Nop1 (antibody staining) in *S. cerevisiae*. Images are representative of at least 5 independent biological replicates.

(C) Growth of the SGA query strain compared to wild-type at 30°C and 37°C. Images are representative of 3 independent biological replicates.

(D) Box plot illustrating the decrease of nucleolar size in stationary phase yeast cells compared to cells in log phase.

(E) Bar plot representing 38 nucleolar fragmentation phenotypes of the essential gene collection imaged and quantified at the permissive and non-permissive temperature. Values on the y-axis represent the fraction of nuclei with fragmented nucleoli in a well (for full list of identified nucleolar fragmentation phenotypes see Table S1).

(F) Average number of nucleoli plotted as a function of fragmentation index. Control wells are shown as yellow circles, while the rest of the wells are colored in grey. The green line represents piece-wise linear regression model fitted to the data, where a blue dot corresponds to a break point. The value of the fragmentation index corresponding to a threshold marking over-fragmented nucleoli is shown as a dashed line. Red circles depict wells containing over-fragmented nucleoli.

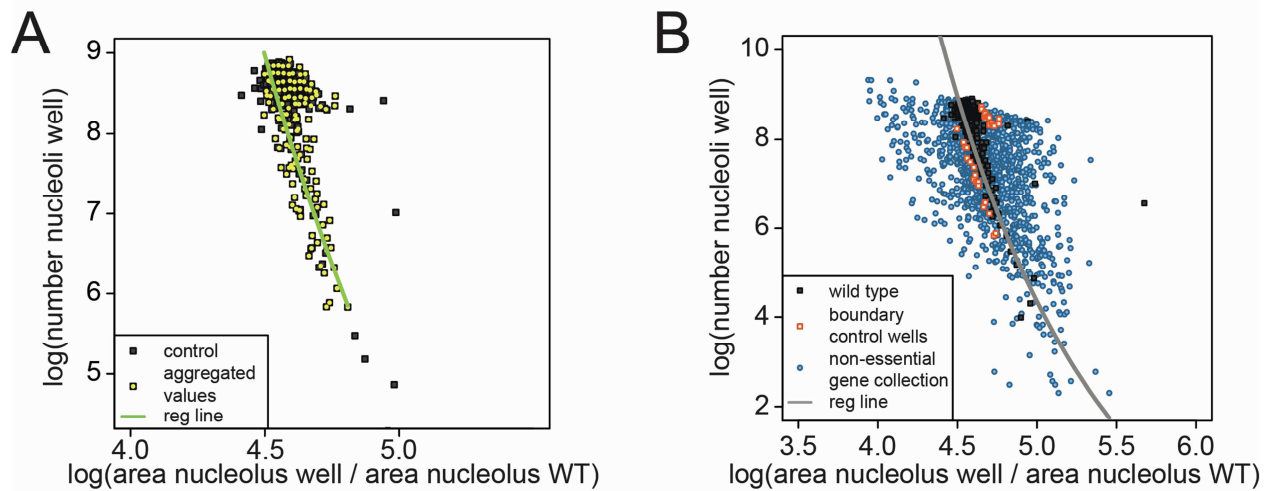

**Figure S2.** Supporting graphs for nucleolar size quantification.

**(A)** Regression analysis for nucleolar area and number of cells in the well for the essential collection. Non-linear regression model (green line) fitted to the aggregated wild-type data. The control wells are shown as grey squares. The aggregated values used to construct the regression model are represented as yellow circles.

**(B)** The regression model fitted to the whole essential collection. The regression line is shown in grey. The grey squares mark WT control wells, whereas the rest of the wells in the collection are plotted as blue line circles. The white squares correspond to the boundary control wells used to discriminate between wells containing over- or under-sized nucleoli and wild-type controls.

**A**

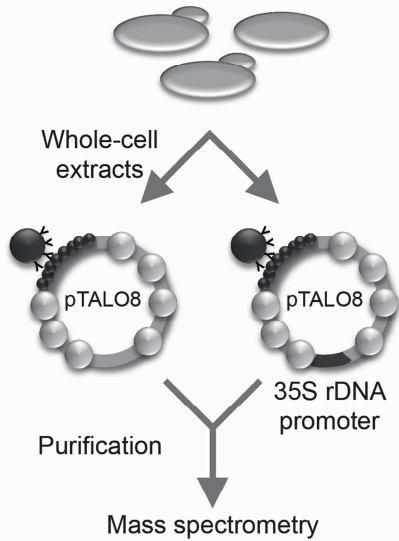

**B**

| Sub-complex                                                        | Protein hits ( <b>bold</b> )                                |
|--------------------------------------------------------------------|-------------------------------------------------------------|
| upstream activating factor (UAF)                                   | <b>Rrn5, Rrn9, Rrn10, Uaf30</b>                             |
| core factor (CF)                                                   | Rrn6, Rrn7, Rrn11                                           |
| regulator of nucleolar silencing and telophase exit (RENT) complex | <b>Net1, Cdc14</b> , Sir2                                   |
| TATA-binding protein (TBP)                                         | <b>Spt15</b>                                                |
| other                                                              | Rrn3, <b>Reb1</b>                                           |
| FACT complex *                                                     | <b>Spt16, Pob3</b>                                          |
| HIR complex *                                                      | <b>Hir2</b>                                                 |
| RSC complex *                                                      | <b>Rsc1, Rsc2, Rsc3, Rsc4, Rsc6, Rsc7, Rsc8, Sth1, Sfh1</b> |

**C**

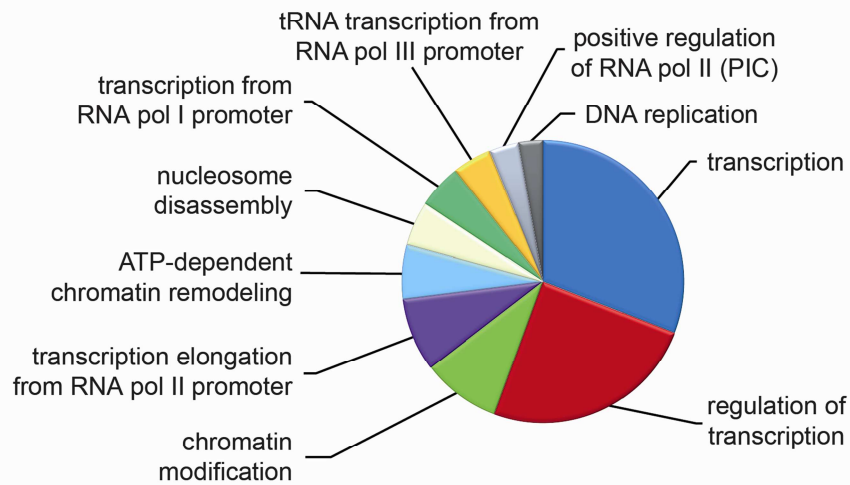

**D**

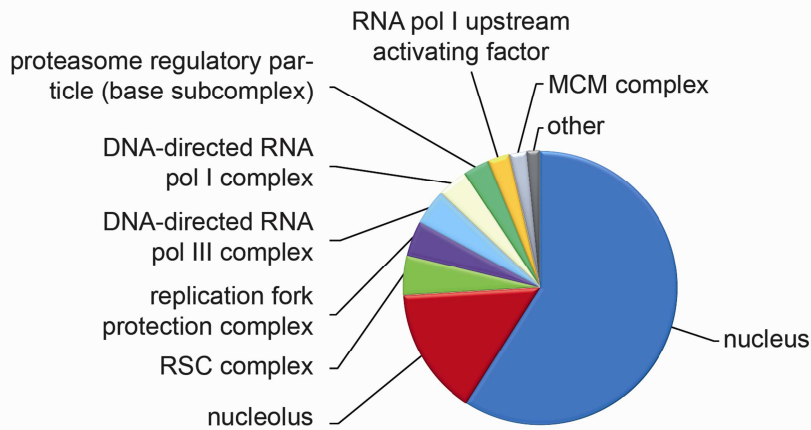

**Figure S3.** The rDNA promoter proteome.

**(A)** Schematic overview of the affinity purification of TALO8-minichromosomes. Minichromosomes containing the 35S rDNA promoter region and LacO repeats are captured by Flag-LacI affinity purification.

**(B)** Table of previously identified and unidentified (asterisks) Pol I transcriptional regulators. Hits found in the TALO8-rDNA purification are highlighted bold.

**(C)** Functional GO term analysis of the identified 35S rRNA promoter-associated proteome upon TALO8 purification.

**(D)** Localization GO term analysis of the identified 35S rRNA promoter-associated proteome upon TALO8 purification.

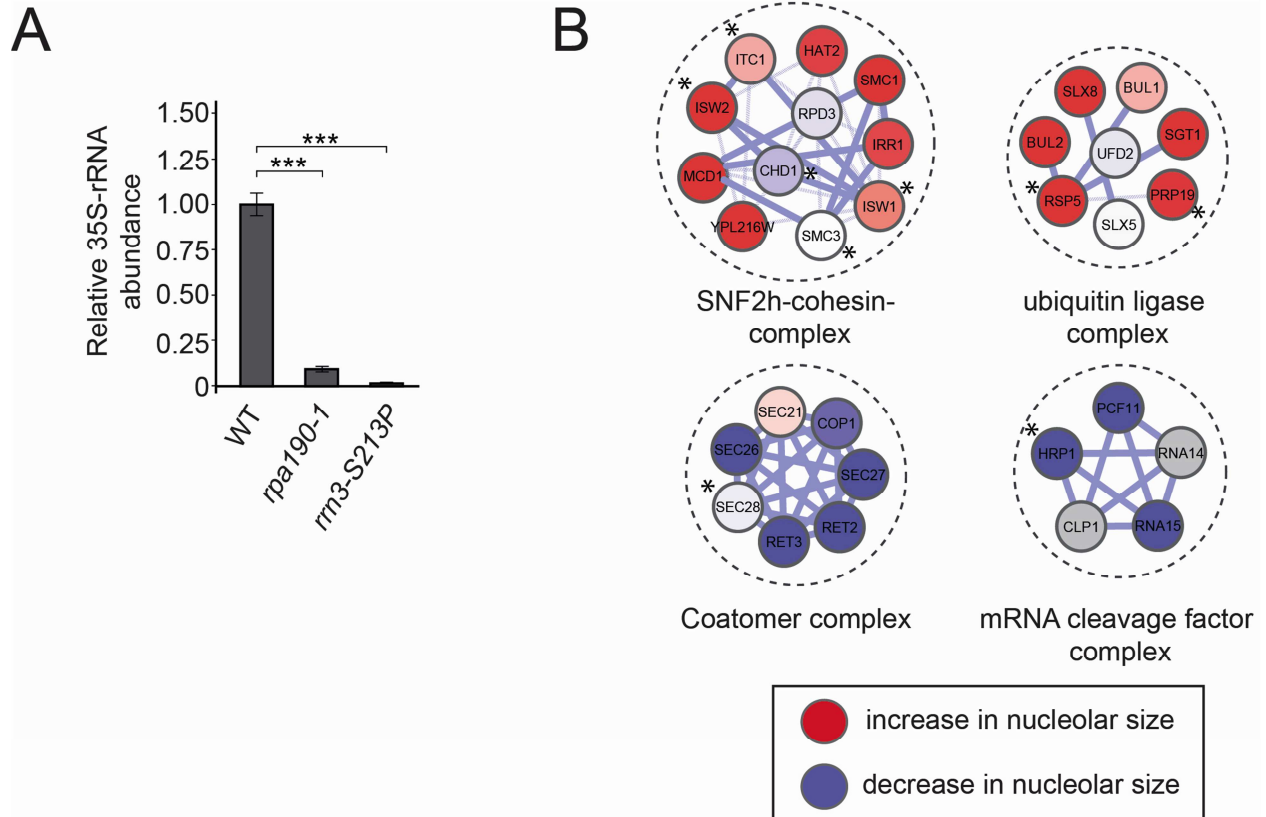

**Figure S4.** Examples of protein complexes that scored in the SGA screen.

(A) Validation of the qRT-PCR strategy to quantify differences in 35S rRNA abundance. Bars represent the means  $\pm$  SD of 5 independent biological replicates. \*\*\* $P < 0.001$ .

(B) Examples of molecular complexes not implicated in transcriptional regulation identified in the SGA screen (red: increase in nucleolar size, blue: decrease in nucleolar size, grey: genes which have not been screened, asterisks denote proteins identified in the TALO8 purification).



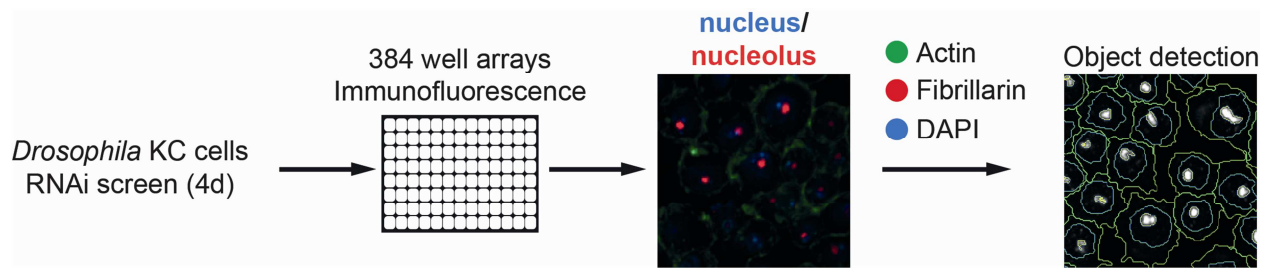

**Figure S5.** A genome-wide RNAi screen for nucleolar size defects in *Drosophila* cell culture. Schematic overview of the RNAi screening strategy (Note: right panel shows a close up of the computer-based segregation of objects of the stained KC cells).

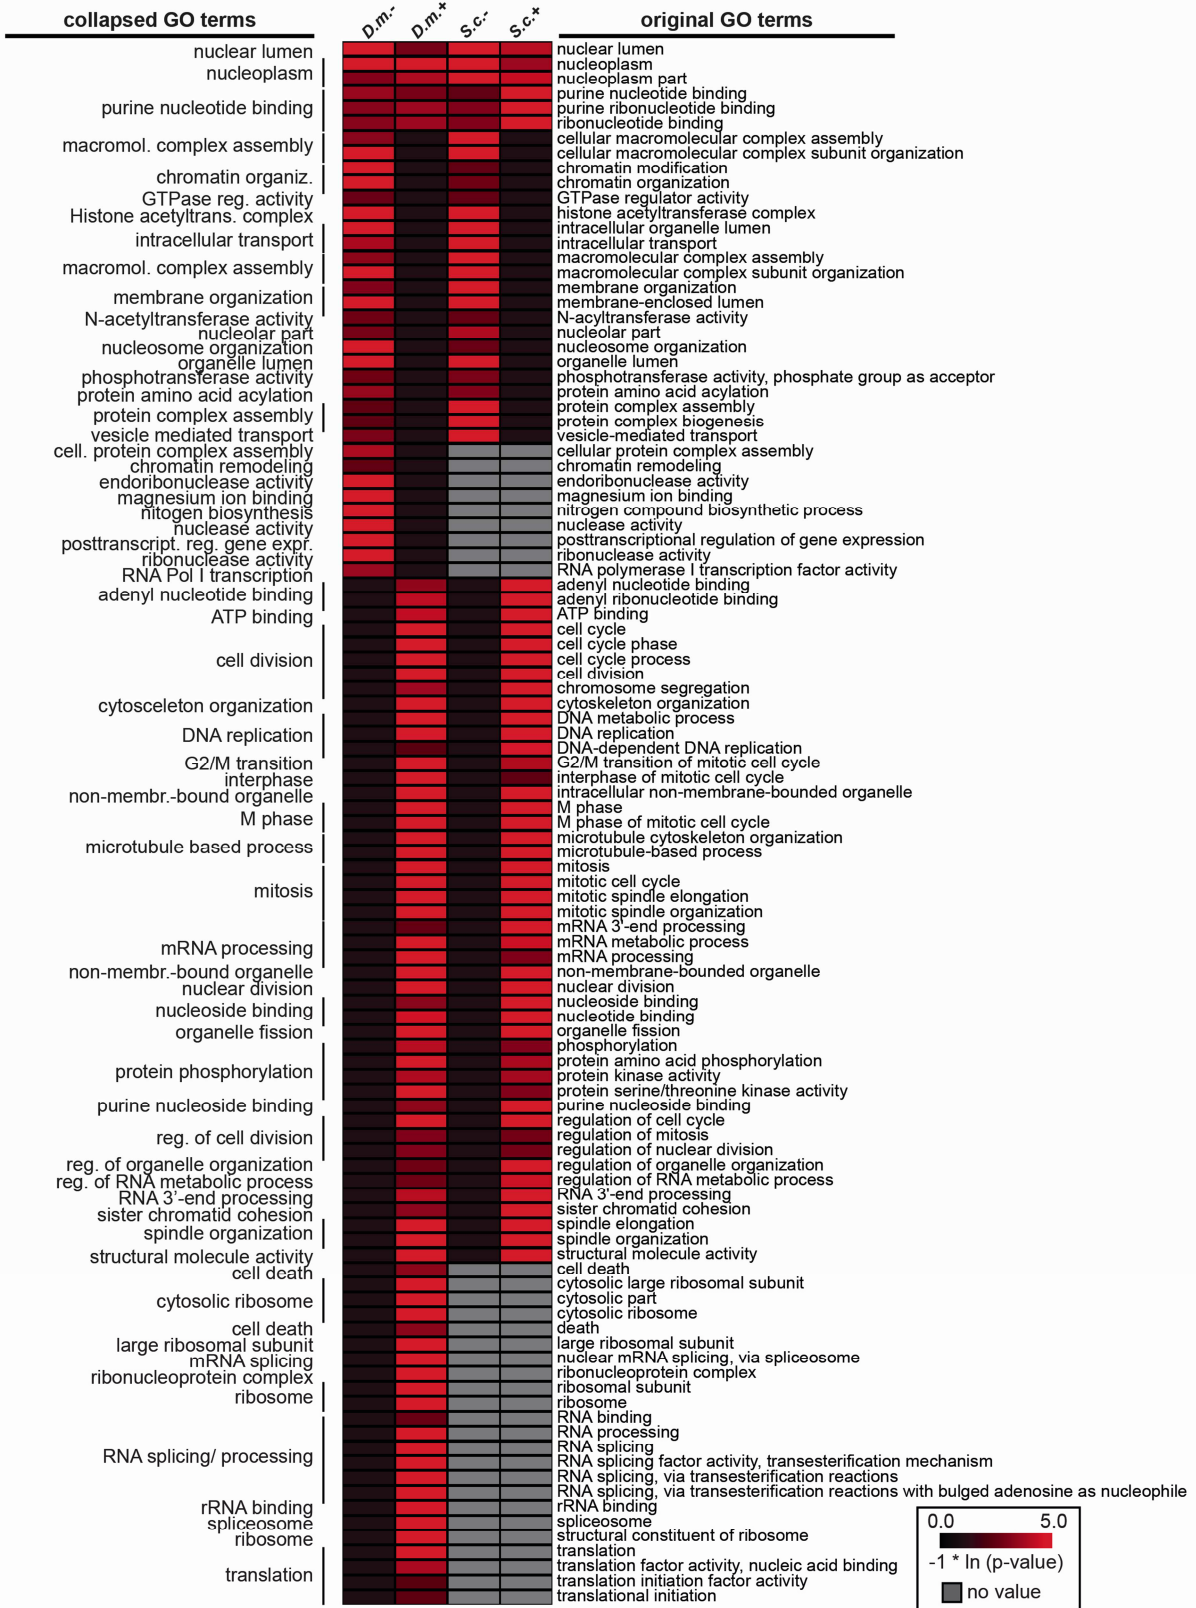

**Figure S6.** Comparative GO term analysis between the *S. cerevisiae* SGA and the *D. melanogaster* RNAi screens.

Heatmap displaying the natural log transformed p-values for the respective GO terms (*D.m.*: *D. melanogaster*, *S.c.*: *S. cerevisiae*, decrease (-) or increase (+) in nucleolar size).

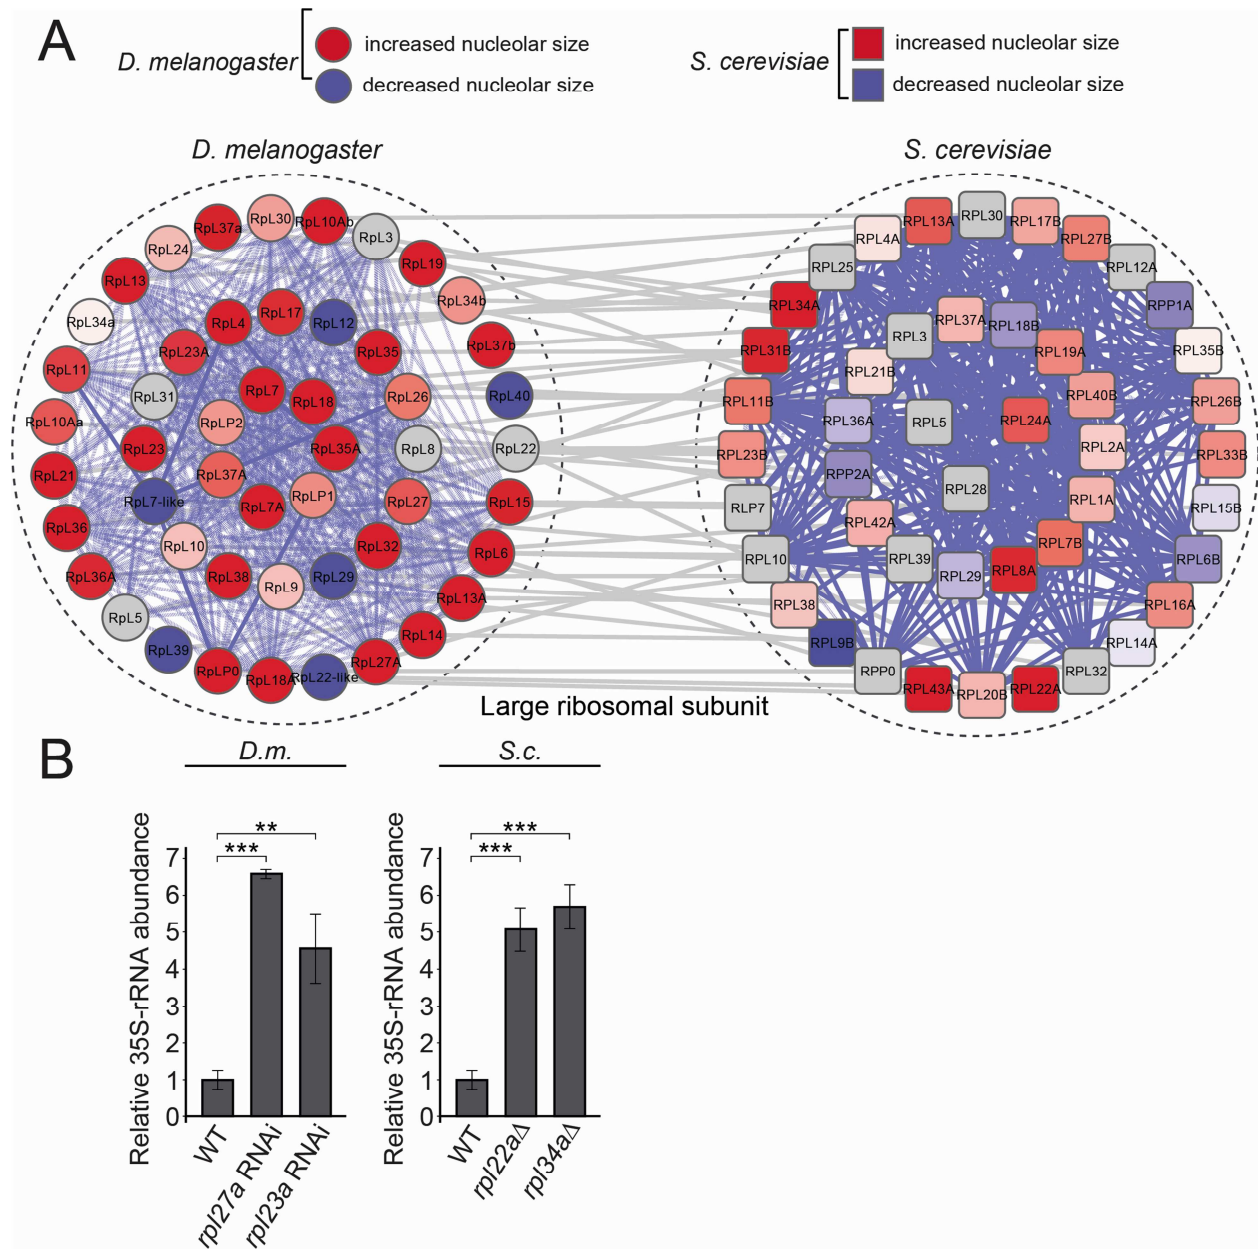

**Figure S7.** Altered nucleolar size upon loss of ribosomal function in *D. melanogaster* and *S. cerevisiae*.

(A) Complex map of the large ribosomal subunit in *D. melanogaster* (round nodes) and *S. cerevisiae* (rectangular nodes) with the respective nucleolar size phenotypes color coded (red: increase in nucleolar size, blue: decrease in nucleolar size, grey: genes which have not been screened or for which no homolog exists in the respective species, blue lines denote protein-protein interaction data, grey lines connect homologous genes).

**(B)** Increase of 35S rRNA abundance upon loss of ribosomal subunits in *D. melanogaster* and *S. cerevisiae* measured by qRT-PCR. Bars represent the means  $\pm$  SD of 5 independent biological replicates. \*\*\* $P < 0.001$ ; \*\* $P < 0.01$

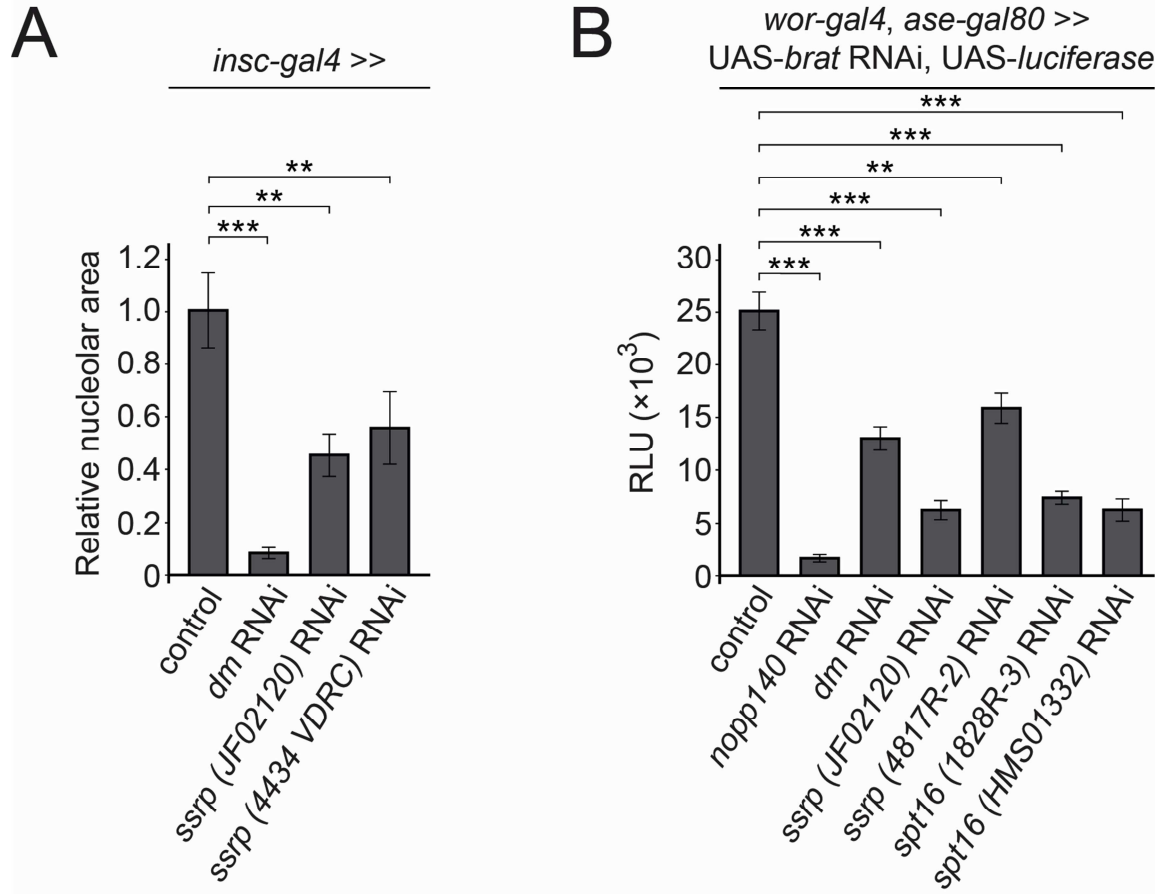

**Figure S8.** The *Drosophila* FACT complex is required for cell growth.

**(A)** Complete data set of the experiment shown in Fig. 5C assaying nucleolar size upon *ssrp* RNAi using two independent non-overlapping RNAi constructs. Bars represent the means  $\pm$  SD of 5 or more independent biological replicates. \*\*\* $P < 0.001$ ; \*\* $P < 0.01$

**(B)** Complete data set of the experiment shown in Fig. 5E quantifying tumor growth based on luciferase expression using independent, non-overlapping RNAi lines targeting *nopp140*, *dm*, *ssrp* and *spt16*. Bars represent the means  $\pm$  SD of 4 independent biological replicates. \*\*\* $P < 0.001$ ; \*\* $P < 0.01$

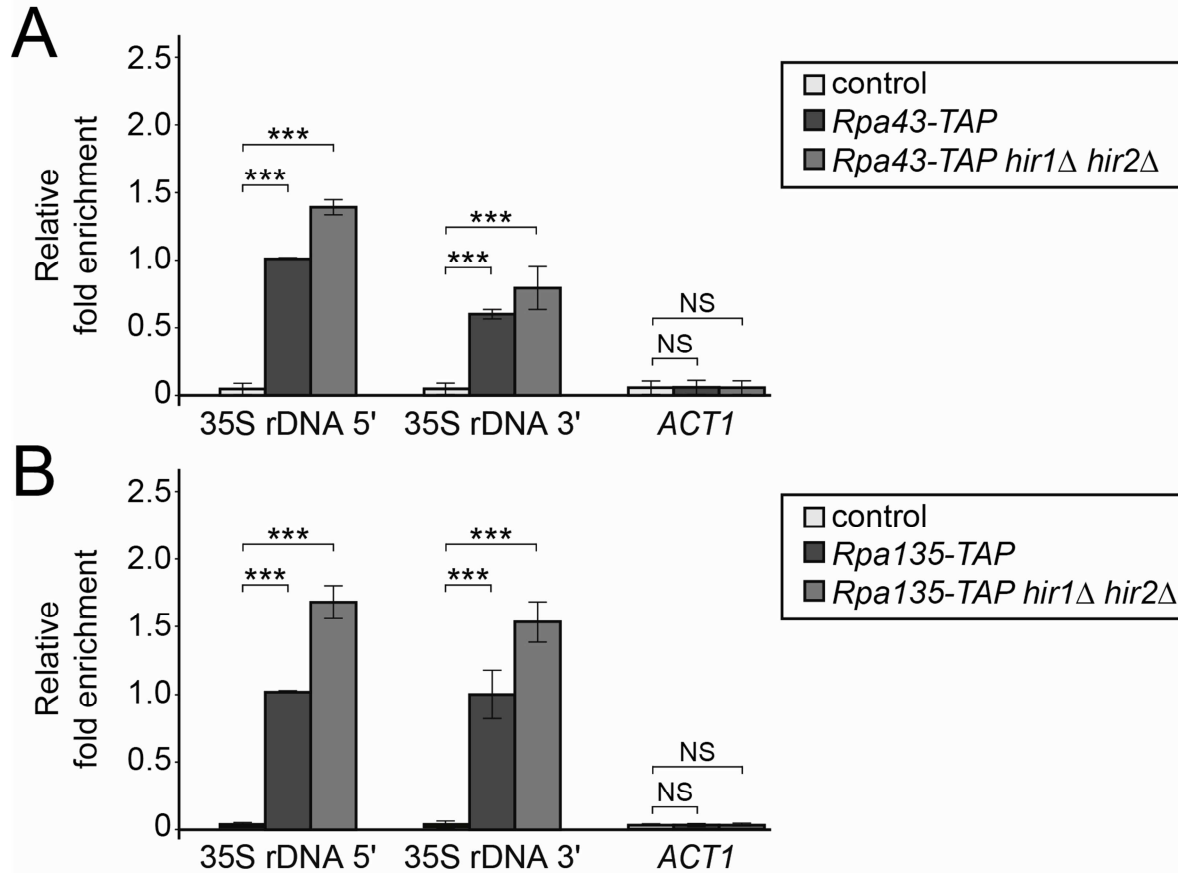

**Figure S9.** The HIR complex double-mutant *hir1Δhir2Δ* shows increased Pol I occupancy over the 35S rDNA region.

ChIP qPCR analysis of TAP-tagged Pol I subunits Rpa43 (**A**) and Rpa135 (**B**) at the 35S rDNA region and the *ACT1* control region was performed. Values are normalized relative to a non-transcribed region (NTR) and the fold enrichment of wild-type from the 5' region of the rDNA locus was set to 1. Bars represent the means  $\pm$  SD of 3 independent biological replicates.

\*\*\* $P < 0.001$ ; NS, not significant

**A**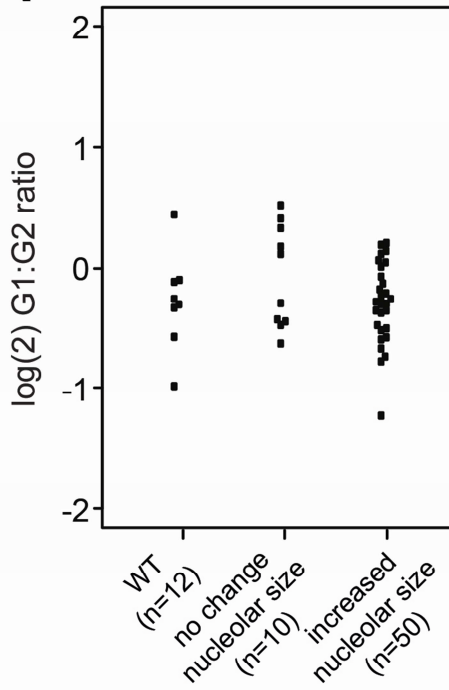**B**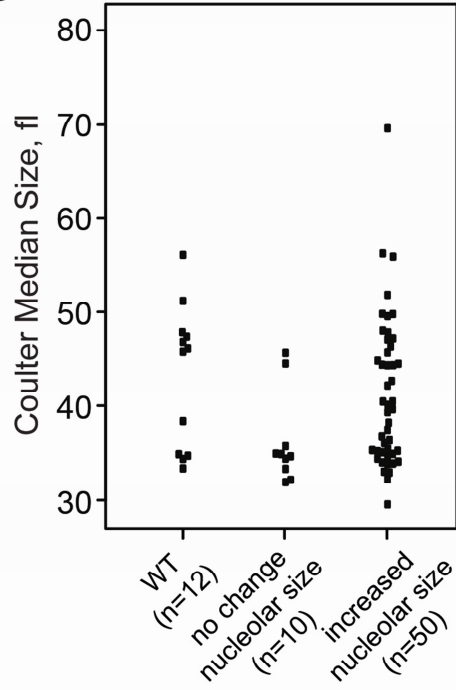**C**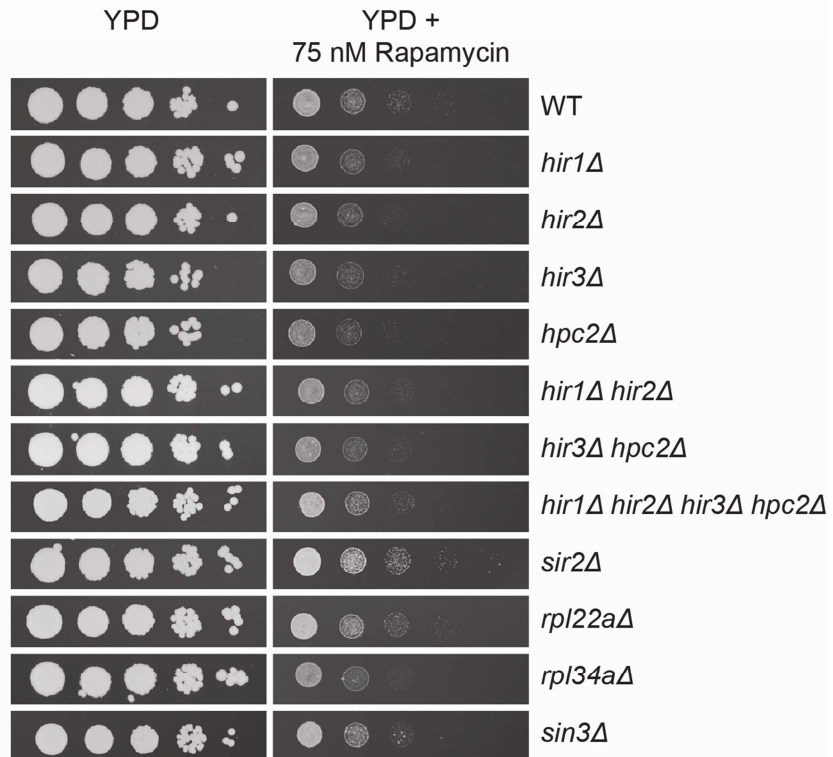



**Figure S10.** Growth measurements of HIR complex mutants.

(A) Cell cycle distribution determined by flow cytometry. N=10 or more independent biological replicates.

(B) Cell size distribution in mid-log phase. N=10 or more independent biological replicates.

(D) Colony growth experiment in the presence and absence of rapamycin. Tenfold serial dilutions of the indicated yeast strains were spotted on YPD plates with or without rapamycin (75 nM) and imaged after incubation for two days at 30°C. In contrast to the transcription silencing mutant *sir3* $\Delta$ , used as positive control, HIR complex mutants do not show increased growth in the presence of rapamycin in comparison to wild-type. Images are representative of 3 independent biological replicates.
